# Supplementary material
Source: Springer Nature journal article supplement (https://www.springermedizin.de/resource/supplementary/12888_2013_1631_MOESM3_ESM.pdf/9480994)
Supplement: MOESM3 [file 9480994]

**Additional file 3:**

**Total Variance (%) and Eigen values for OMS-HC-15 and subscales, by group**

|                     | <b>n</b> | <b>Overall</b> | <b>Attitude</b> | <b>Disclosure/<br/>Help-seeking</b> | <b>Social Distance</b> |
|---------------------|----------|----------------|-----------------|-------------------------------------|------------------------|
| Crude<br>(everyone) | 1448     | 45.3%          | 16.2% (2.44)    | 15.2% (2.28)                        | 13.9% (2.08)           |
| MD                  | 826      | 45.0%          | 16.0% (2.40)    | 14.7% (2.19)                        | 14.3% (2.15)           |
| Nurse               | 238      | 48.5%          | 19.1% (2.87)    | 15.7% (2.35)                        | 13.7% (2.06)           |
| Allied Health       | 202      | 47.7%          | 16.6% (2.49)    | 15.9% (2.38)                        | 15.2% (2.27)           |
| Social worker       | 41       | 55.4%          | 19.9% (2.98)    | 18.6% (2.78)                        | 17.0% (2.55)           |
